# Supplementary material for: Immunogenicity of a third dose with mRNA-vaccines in the ChAdOx1-S/BNT162b2 vaccination regimen against SARS-CoV-2 variants
Source: PubMed Central journal article supplement (PMC11404211; doi:10.1016/j.isci.2024.110728), 2024-08-14
Supplement: mmc1.pdf [file mmc1.pdf]

## **Supplemental information**

### **Immunogenicity of a third dose with mRNA-vaccines in the ChAdOx1-S/BNT162b2 vaccination regimen against SARS-CoV-2 variants**

**Javier García-Pérez, Alberto M. Borobia, Mayte Pérez-Olmeda, Antonio Portolés, Luis Castaño, Magdalena Campins-Artí, María Jesús Bertrán, Mercedes Bermejo, José Ramón Arribas, Andrea López, Ana Ascaso-del-Río, Eunáte Arana-Arri, Inmaculada Fuentes Camps, Anna Vilella, Almudena Cascajero, María Teresa García-Morales, María Castillo de la Osa, Carla Pérez Ingidua, David Lora, Paloma Jiménez-Santana, Silvia Pino-Rosa, Agustín Gómez de la Cámara, Erick De La Torre-Tarazona, Esther Calonge, Raquel Cruces, Cristóbal Belda-Iniesta, José Alcamí, Jesús Frías, Antonio J. Carcas, Francisco Díez-Fuertes, and CombiVacS Study Group**

**Data S1. Figures S1-S3 and Tables S1-S16.**

**Figure S1. Humoral immune response by age, related to figures 2 and 4.** Group A represents participants aged 18-49 years and group B those aged 50-59 years. Total anti-RBD Igs were expressed as BAU/ml and variant-specific neutralization capacity as NT50. Data are represented as median and interquartile range.

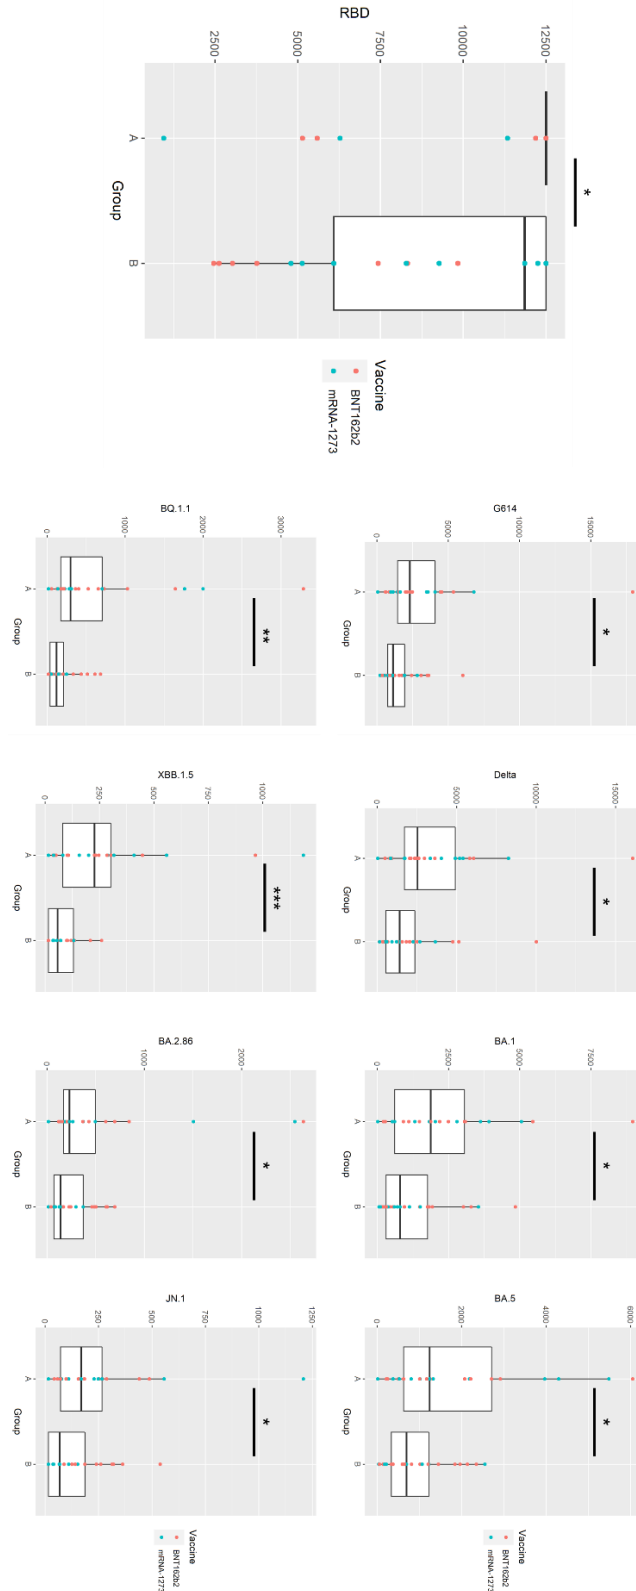

**Figure S2. Humoral immune response by sex, related to figures 2 and 4.** Total anti-RBD Igs were expressed as BAU/ml and variant-specific neutralization capacity as NT50. Data are represented as median and interquartile range.

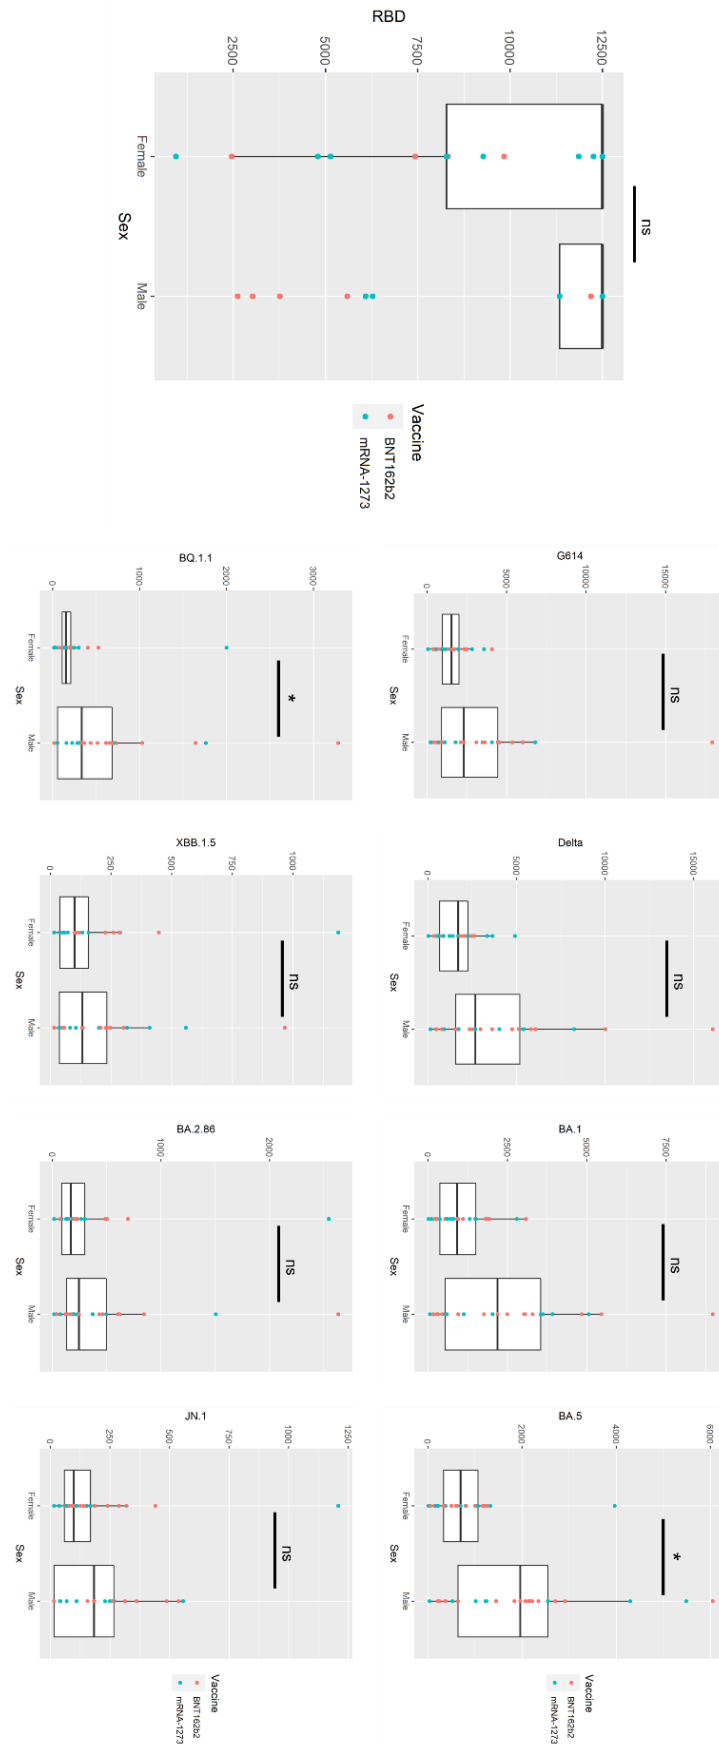

**Figure S3. Heatmap showing the prevalence of the mutations of the lineages used in this study according to GISAID database, related to STAR Methods.**

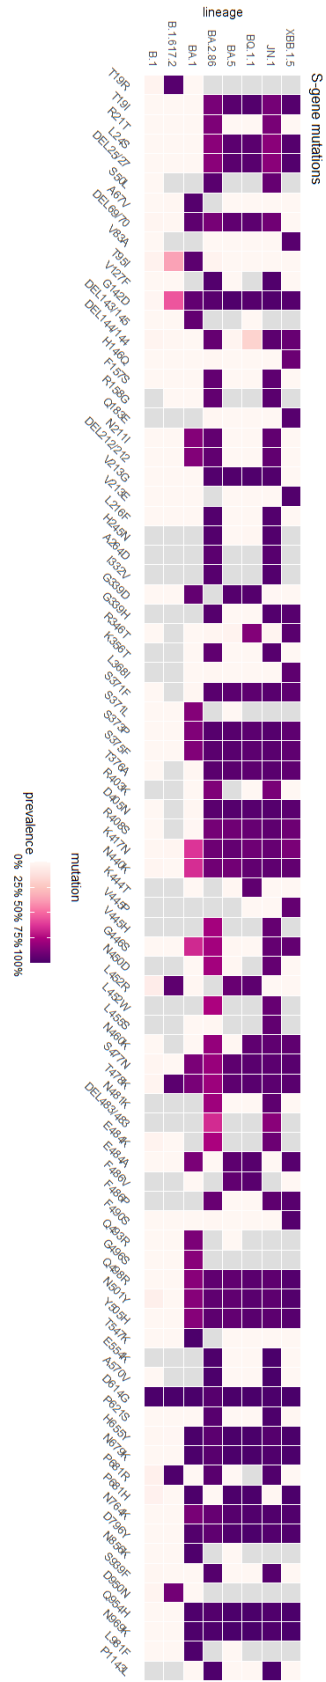

**Table S1. Summary statistics for SARS-CoV-2 anti-spike Ig response comparing BNT162b2 and mRNA-1273 arms in participants with a negative result of IgG to SARS-CoV-2 nucleocapsid, related to Figure 2.**

|                | <b>BNT162b2</b> |                          | <b>mRNA-1273</b> |                          | <b>p-value</b> |
|----------------|-----------------|--------------------------|------------------|--------------------------|----------------|
|                | n               | Geometric mean [95% CI]  | n                | Geometric mean [95% CI]  |                |
| <b>day 0</b>   | 33              | 1381.9[990.0;1929.0]     | 28               | 1154.7[754.3;1767.6]     | 0.307          |
| <b>day 28</b>  | 30              | 12220.6[11896.8;12553.1] | 26               | 12243.3[11861.7;12637.2] | 0.903          |
| <b>day 90</b>  | 24              | 9157.7[7813.6;10733.1]   | 22               | 10431.8[9158.3;11882.3]  | 0.184          |
| <b>day 180</b> | 11              | 6613.1[3687.5;11859.9]   | 10               | 10302.9[8156.7;13013.8]  | 0.138          |

Units: BAU/mL

**Table S2. Comparative neutralization of SARS-CoV-2 ancestral G614 variant in BNT162b2 and mRNA-1273 arms in participants with a negative result of IgG to SARS-CoV-2 nucleocapsid, related to Figure 2.**

|                | <b>BNT162b2</b> |                         | <b>mRNA-1273</b> |                         | <b>p-value</b> |
|----------------|-----------------|-------------------------|------------------|-------------------------|----------------|
|                | n               | Geometric mean [95% CI] | n                | Geometric mean [95% CI] |                |
| <b>day 0</b>   | 33              | 113.7[75.0;172.4]       | 28               | 129.4[73.0;229.5]       | 0.728          |
| <b>day 28</b>  | 30              | 1929.0[1499.7;2481.3]   | 26               | 2693.3[2025.8;3580.7]   | 0.080          |
| <b>day 90</b>  | 24              | 1010.7[707.3;1444.3]    | 22               | 1794.9[1223.9;2632.4]   | 0.038          |
| <b>day 180</b> | 11              | 980.2[405.9;2367.0]     | 10               | 1522.0[771.7;3002.0]    | 0.597          |

Units: neutralising titer 50 (NT<sub>50</sub>)

**Table S3. Comparative neutralization of SARS-CoV-2 Delta variant (B.1.617.2 lineage) in BNT162b2 and mRNA-1273 arms in participants with a negative result of IgG to SARS-CoV-2 nucleocapsid, related to Figure 2.**

|                | <b>BNT162b2</b> |                         | <b>mRNA-1273</b> |                         | <b>p-value</b> |
|----------------|-----------------|-------------------------|------------------|-------------------------|----------------|
|                | n               | Geometric mean [95% CI] | n                | Geometric mean [95% CI] |                |
| <b>day 0</b>   | 33              | 74.0[45.5;120.4]        | 28               | 116.1[63.8;211.3]       | 0.330          |
| <b>day 28</b>  | 30              | 2027.1[1539.5;2669.1]   | 26               | 2926.7[2196.2;3900.0]   | 0.022          |
| <b>day 90</b>  | 24              | 852.3[538.6;1348.7]     | 22               | 1500.2[934.2;2409.3]    | 0.073          |
| <b>day 180</b> | 11              | 811.8[291.7;2259.1]     | 10               | 1525.1[615.4;3779.6]    | 0.342          |

Units: neutralising titer 50 (NT<sub>50</sub>)

**Table S4. Comparative neutralization of SARS-CoV-2 Omicron variant (BA.1 lineage) in BNT162b2 and mRNA-1273 arms in participants with a negative result of IgG to SARS-CoV-2 nucleocapsid, related to Figure 2.**

|                | <b>BNT162b2</b> |                                | <b>mRNA-1273</b> |                                | <b>p-value</b> |
|----------------|-----------------|--------------------------------|------------------|--------------------------------|----------------|
|                | <b>n</b>        | <b>Geometric mean [95% CI]</b> | <b>n</b>         | <b>Geometric mean [95% CI]</b> |                |
| <b>day 0</b>   | 33              | 36.1[22.4;58.3]                | 28               | 42.2[22.2;80.1]                | 0.839          |
| <b>day 28</b>  | 30              | 725.0[493.4;1065.2]            | 26               | 1368.3[934.9;2002.6]           | 0.009          |
| <b>day 90</b>  | 24              | 508.4[327.0;790.5]             | 22               | 904.9[534.4;1532.4]            | 0.106          |
| <b>day 180</b> | 11              | 471.1[150.4;1475.6]            | 10               | 852.4[344.3;2110.2]            | 0.342          |

Units: neutralising titer 50 (NT<sub>50</sub>)



**Table S5. Summary statistics for SARS-CoV-2 anti-spike Ig response comparing BNT162b2 and mRNA-1273 arms in participants with a positive result of IgG to SARS-CoV-2 nucleocapsid, related to Figure 2.**

|                | <b>BNT162b2</b> |                                | <b>mRNA-1273</b> |                                | <b>p-value</b> |
|----------------|-----------------|--------------------------------|------------------|--------------------------------|----------------|
|                | <b>n</b>        | <b>Geometric mean [95% CI]</b> | <b>n</b>         | <b>Geometric mean [95% CI]</b> |                |
| <b>day 0</b>   | 8               | 9764.0[6851.6;13914.5]         | 6                | 9630.4[6148.9;15083.2]         | 0.830          |
| <b>day 28</b>  | 10              | 12326.2[11942.0;12722.8]       | 7                | 12500[12500;12500]             | 0.473          |
| <b>day 90</b>  | 13              | 10685.5[8788.5;12992.0]        | 9                | 11631.8[10324.9;13104.1]       | 0.640          |
| <b>day 180</b> | 18              | 9567.8[7467.6;12258.8]         | 11               | 10755.2[8739.9;13235.2]        | 0.652          |

Units: BAU/mL

**Table S6. Comparative neutralization of SARS-CoV-2 ancestral G614 variant in BNT162b2 and mRNA-1273 arms in participants with a positive result of IgG to SARS-CoV-2 nucleocapsid, related to Figure 2.**

|                | <b>BNT162b2</b> |                                | <b>mRNA-1273</b> |                                | <b>p-value</b> |
|----------------|-----------------|--------------------------------|------------------|--------------------------------|----------------|
|                | <b>n</b>        | <b>Geometric mean [95% CI]</b> | <b>n</b>         | <b>Geometric mean [95% CI]</b> |                |
| <b>day 0</b>   | 8               | 1530.9[709.0;3305.3]           | 6                | 1054.1[436.4;2546.4]           | 0.561          |
| <b>day 28</b>  | 10              | 4458.6[3199.8;6212.5]          | 7                | 5192.5[2981.1;9044.2]          | 0.526          |
| <b>day 90</b>  | 13              | 2435.5[1494.1;3970.0]          | 9                | 3422.3[1558.0;7517.1]          | 0.841          |
| <b>day 180</b> | 18              | 2123.9[1363.7;3307.6]          | 11               | 1624.1[1015.8;2596.7]          | 0.432          |

Units: neutralising titer 50 (NT<sub>50</sub>)

**Table S7. Comparative neutralization of SARS-CoV-2 Delta variant (B.1.617.2 lineage) in BNT162b2 and mRNA-1273 arms in participants with a positive result of IgG to SARS-CoV-2 nucleocapsid, related to Figure 2.**

|                | <b>BNT162b2</b> |                                | <b>mRNA-1273</b> |                                | <b>p-value</b> |
|----------------|-----------------|--------------------------------|------------------|--------------------------------|----------------|
|                | <b>n</b>        | <b>Geometric mean [95% CI]</b> | <b>n</b>         | <b>Geometric mean [95% CI]</b> |                |
| <b>day 0</b>   | 8               | 2203.0[1227.3;3954.4]          | 6                | 1239.9[492.0;3124.9]           | 0.175          |
| <b>day 28</b>  | 10              | 5512.8[4261.2;7132.1]          | 7                | 5347.3[2973.3;9616.7]          | 0.733          |
| <b>day 90</b>  | 13              | 2633.7[1818.2;3815.2]          | 9                | 2897.0[1922.1;4366.2]          | 0.841          |
| <b>day 180</b> | 18              | 2694.9[1762.9;4119.7]          | 11               | 1699.5[1082.1;2669.0]          | 0.157          |

Units: neutralising titer 50 (NT<sub>50</sub>)

**Table S8. Comparative neutralization of SARS-CoV-2 Omicron variant (BA.1 lineage) in BNT162b2 and mRNA-1273 arms in participants with a positive result of IgG to SARS-CoV-2 nucleocapsid, related to Figure 2.**

|                | <b>BNT162b2</b> |                         | <b>mRNA-1273</b> |                         | <b>p-value</b> |
|----------------|-----------------|-------------------------|------------------|-------------------------|----------------|
|                | n               | Geometric mean [95% CI] | n                | Geometric mean [95% CI] |                |
| <b>day 0</b>   | 8               | 1390.8[738.8;2618.1]    | 6                | 1123.9[395.7;3192.2]    | 0.948          |
| <b>day 28</b>  | 10              | 3019.9[1963.0;4645.9]   | 7                | 3338.2[1807.1;6166.9]   | 0.733          |
| <b>day 90</b>  | 13              | 1825.2[1150.7;2895.0]   | 9                | 1634.4[1052.2;2538.6]   | 0.504          |
| <b>day 180</b> | 18              | 1480.3[880.8;2487.9]    | 11               | 1258.3[735.5;2152.8]    | 0.544          |

Units: neutralising titer 50 (NT<sub>50</sub>)

**Table S9. Comparative humoral immune response against SARS-CoV-2 variants G614, Delta, and BA.1 between participants with a negative and positive result of IgG to SARS-CoV-2 nucleocapsid in BNT162b2 arm, related to Figure 2.**

|                |                | N-* |                            | N+** |                            | p-value                |
|----------------|----------------|-----|----------------------------|------|----------------------------|------------------------|
|                |                | n   | Geometric mean [95% CI]    | n    | Geometric mean [95% CI]    |                        |
| <b>Day 0</b>   | <b>RBD-Igs</b> | 33  | 1381.9 [990.0; 1929.0]     | 8    | 9764.0 [6851.6- 13914.5]   | 6.3 x 10 <sup>-5</sup> |
|                | <b>G614</b>    | 33  | 113.7 [75.0; 172.4]        | 8    | 1530.9 [709.0; 3305.3]     | 5.6 x 10 <sup>-5</sup> |
|                | <b>Delta</b>   | 33  | 74.0 [45.5; 120.4]         | 8    | 2203.0 [1227.3; 3954.4]    | 3.1 x 10 <sup>-5</sup> |
|                | <b>BA.1</b>    | 33  | 36.1 [22.4; 58.3]          | 8    | 1390.8 [738.8; 2618.1]     | 1.6 x 10 <sup>-5</sup> |
| <b>Day 28</b>  | <b>RBD-Igs</b> | 30  | 12220.6 [11896.8; 12553.2] | 10   | 12326.2 [11942.0; 12722.8] | 0.952                  |
|                | <b>G614</b>    | 30  | 1929.0 [1499.7; 2481.3]    | 10   | 4458.6 [3199.8; 6212.5]    | 4.3 x 10 <sup>-4</sup> |
|                | <b>Delta</b>   | 30  | 2027.1 [1539.5; 2669.1]    | 10   | 5512.8 [4261.2; 7132.1]    | 4.0 x 10 <sup>-5</sup> |
|                | <b>BA.1</b>    | 30  | 725.0 [493.4; 1065.2]      | 10   | 3019.9 [1963.0; 4645.9]    | 4.0 x 10 <sup>-5</sup> |
| <b>Day 90</b>  | <b>RBD-Igs</b> | 24  | 9157.7 [7813.6; 10733.1]   | 13   | 10685.5 8788.5; 12992.0]   | 0.1046                 |
|                | <b>G614</b>    | 24  | 1010.7 [707.3; 1444.3]     | 13   | 2435.5 [1494.1; 3970.0]    | 0.004                  |
|                | <b>Delta</b>   | 24  | 852.3 [538.6; 1348.7]      | 13   | 2633.8 [1818.2; 3815.2]    | 3.2 x 10 <sup>-4</sup> |
|                | <b>BA.1</b>    | 24  | 508.4 [327.0; 790.5]       | 13   | 1825.2 [1150.7; 2895.0]    | 5.0 x 10 <sup>-4</sup> |
| <b>Day 180</b> | <b>RBD-Igs</b> | 11  | 6613.1 [3687.5; 11859.9]   | 18   | 9567.8 [7467.6; 12258.8]   | 0.092                  |
|                | <b>G614</b>    | 11  | 980.2 [405.9; 2367.0]      | 18   | 2123.9 [1363.8; 3307.7]    | 0.204                  |
|                | <b>Delta</b>   | 11  | 811.8 [291.7; 2259.1]      | 18   | 2694.9 [1762.9; 4119.7]    | 0.032                  |
|                | <b>BA.1</b>    | 11  | 471.1 [150.4; 1475.6]      | 18   | 1480.4 [880.8; 2487.9]     | 0.061                  |

Units: neutralising titer 50 (NT<sub>50</sub>)

\*N-: negative result of IgG to SARS-CoV-2 nucleocapsid

\*\*N+: positive result of IgG to SARS-CoV-2 nucleocapsid

**Table S10. Comparative humoral immune response against SARS-CoV-2 variants G614, Delta, and BA.1 between participants with a negative and positive result of IgG to SARS-CoV-2 nucleocapsid in mRNA-1273 arm, related to Figure 2.**

|                |                | N-* |                            | N+** |                            | p-value                |
|----------------|----------------|-----|----------------------------|------|----------------------------|------------------------|
|                |                | n   | Geometric mean [95% CI]    | n    | Geometric mean [95% CI]    |                        |
| <b>Day 0</b>   | <b>RBD-Igs</b> | 28  | 1154.7 [754.3; 1767.6]     | 6    | 9630.5 [6148.9; 15083.2]   | 7.4 x 10 <sup>-4</sup> |
|                | <b>G614</b>    | 28  | 129.4 [73.0; 229.5]        | 6    | 1054.1 [436.4; 2546.4]     | 0.003                  |
|                | <b>Delta</b>   | 28  | 116.1 [63.8; 211.3]        | 6    | 1239.9 [492.0; 3124.9]     | 0.002                  |
|                | <b>BA.1</b>    | 28  | 42.2 [22.2; 80.1]          | 6    | 1123.9 [395.7; 3192.2]     | 9.1 x 10 <sup>-4</sup> |
| <b>Day 28</b>  | <b>RBD-Igs</b> | 26  | 12243.3 [11861.7; 12637.2] | 7    | 12500.0 [12500.0; 12500.0] | 0.377                  |
|                | <b>G614</b>    | 26  | 2693.3 [2025.8; 3580.7]    | 7    | 5192.5 [2981.2; 9044.2]    | 0.043                  |
|                | <b>Delta</b>   | 26  | 2926.7 [2196.2; 3900.0]    | 7    | 5347.3 [2973.3; 9616.7]    | 0.099                  |
|                | <b>BA.1</b>    | 26  | 1368.3 [934.9; 2002.6]     | 7    | 3338.3 [1807.1; 6166.9]    | 0.043                  |
| <b>Day 90</b>  | <b>RBD-Igs</b> | 22  | 10431.8 [9158.3; 11882.3]  | 9    | 11631.8 [10324.9; 13104.1] | 0.244                  |
|                | <b>G614</b>    | 22  | 1795.0 [1223.9; 2632.4]    | 9    | 3422.3 [1558.0; 7517.1]    | 0.094                  |
|                | <b>Delta</b>   | 22  | 1500.2 [934.2; 2409.3]     | 9    | 2897.0 [1922.1; 4366.2]    | 0.023                  |
|                | <b>BA.1</b>    | 22  | 904.9 [534.4; 1532.4]      | 9    | 1634.4 [1052.2; 2538.6]    | 0.078                  |
| <b>Day 180</b> | <b>RBD-Igs</b> | 10  | 10302.9 [8156.7; 13013.8]  | 11   | 10755.2 [8740.0; 13235.2]  | 0.717                  |
|                | <b>G614</b>    | 10  | 1522.0 [771.7; 3002.0]     | 11   | 1624.1 [1015.8; 2596.7]    | 0.918                  |
|                | <b>Delta</b>   | 10  | 1525.1 [615.4; 3779.6]     | 11   | 1699.5 [1082.1; 2669.0]    | 0.972                  |
|                | <b>BA.1</b>    | 10  | 852.4 [344.3; 2110.2]      | 11   | 1258.3 [735.5; 2152.8]     | 0.704                  |

Units: neutralising titer 50 (NT<sub>50</sub>)

\*N-: negative result of IgG to SARS-CoV-2 nucleocapsid

\*\*N+: positive result of IgG to SARS-CoV-2 nucleocapsid

**Table S11. Comparative neutralization of SARS-CoV-2 Omicron sublineages (BA4/BA.5, BQ.1.1, and XBB.1.5/XBB.1.9) in BNT162b2 and mRNA-1273 arms at day 180, related to Figure 4.**

|      |                        | <b>BNT162b2</b> |                         | <b>mRNA-1273</b> |                         | <b>p-value</b> |
|------|------------------------|-----------------|-------------------------|------------------|-------------------------|----------------|
|      |                        | n               | Geometric mean [95% CI] | n                | Geometric mean [95% CI] |                |
| N-*  | <b>BA.4/BA.5</b>       | 11              | 317.7 [117.9; 855.8]    | 10               | 648.4 [257.0; 1636.1]   | 0.245          |
|      | <b>BQ.1.1</b>          | 11              | 76.8 [32.5; 181.5]      | 10               | 166.6 [72.4; 383.1]     | 0.289          |
|      | <b>XBB.1.5/XBB.1.9</b> | 11              | 36.9 [18.4; 74.0]       | 10               | 66.8 [35.1; 127.1]      | 0.180          |
|      | <b>BA.2.86</b>         | 11              | 101.5 [39.1; 263.2]     | 10               | 156.4 [59.8; 408.9]     | 0.457          |
|      | <b>JN.1</b>            | 11              | 47.3 [25.0; 89.4]       | 10               | 90.6 [30.6; 268.6]      | 0.205          |
| N+** | <b>BA.4/BA.5</b>       | 18              | 1327.8 [778.8; 2263.7]  | 11               | 970.1 [502.3; 1873.6]   | 0.514          |
|      | <b>BQ.1.1</b>          | 18              | 263.9 [136.6; 510.0]    | 11               | 199.6 [64.2; 620.7]     | 0.574          |
|      | <b>XBB.1.5/XBB.1.9</b> | 18              | 150.1 [84.6; 266.1]     | 11               | 117.9 [51.8; 268.3]     | 0.458          |
|      | <b>BA.2.86</b>         | 18              | 249.9 [137.7; 453.4]    | 11               | 245.7 [103.8; 581.7]    | 0.928          |
|      | <b>JN.1</b>            | 18              | 123.3 [68.9; 220.7]     | 11               | 129.6 [59.8; 281.2]     | 0.822          |

Units: neutralising titer 50 (NT<sub>50</sub>)

\*N-: negative result of IgG to SARS-CoV-2 nucleocapsid

\*\*N+: positive result of IgG to SARS-CoV-2 nucleocapsid

**Table S12. Comparative neutralization of SARS-CoV-2 Omicron sublineages (BA4/BA.5, BQ.1.1, and XBB.1.5/XBB.1.9) between N- and N+ subjects in BNT162b2 and mRNA-1273 arms at day 180, related to Figure 4.**

|                  |                        | N-* |                         | N+** |                         | p-value |
|------------------|------------------------|-----|-------------------------|------|-------------------------|---------|
|                  |                        | n   | Geometric mean [95% CI] | n    | Geometric mean [95% CI] |         |
| <b>BNT162b2</b>  | <b>BA.4/BA.5</b>       | 11  | 317.7 [117.9; 855.8]    | 10   | 1327.8 [778.8; 2263.7]  | 0.004   |
|                  | <b>BQ.1.1</b>          | 11  | 76.8 [32.5; 181.5]      | 10   | 263.9 [136.6; 510.0]    | 0.026   |
|                  | <b>XBB.1.5/XBB.1.9</b> | 11  | 36.9 [18.4; 74.0]       | 10   | 150.1 [84.6; 266.1]     | 0.005   |
|                  | <b>BA.2.86</b>         | 11  | 101.5 [39.1; 263.2]     | 10   | 249.9 [137.7; 453.4]    | 0.137   |
|                  | <b>JN.1</b>            | 11  | 47.3 [25.0; 89.4]       | 10   | 123.3 [68.9; 220.7]     | 0.032   |
| <b>mRNA-1273</b> | <b>BA.4/BA.5</b>       | 18  | 648.4 [257.0; 1636.1]   | 11   | 970.1 [502.3; 1873.6]   | 0.605   |
|                  | <b>BQ.1.1</b>          | 18  | 166.6 [72.4; 383.1]     | 11   | 199.6 [64.2; 620.7]     | 0.860   |
|                  | <b>XBB.1.5/XBB.1.9</b> | 18  | 66.8 [35.1; 127.1]      | 11   | 117.9 [51.8; 268.3]     | 0.341   |
|                  | <b>BA.2.86</b>         | 18  | 156.4 [59.8; 408.9]     | 11   | 245.7 [103.8; 581.7]    | 0.647   |
|                  | <b>JN.1</b>            | 18  | 90.6 [30.6; 268.6]      | 11   | 129.6 [59.8; 281.2]     | 0.972   |

Units: neutralising titer 50 (NT<sub>50</sub>)

\*N-: negative result of IgG to SARS-CoV-2 nucleocapsid

\*\*N+: positive result of IgG to SARS-CoV-2 nucleocapsid



**Table S13. Neutralizing response by NT<sub>50</sub> categories against different SARS-CoV-2 variants in N- subjects of BNT162b2 arm at day 180, related to Figure 4.**

|                      | BNT162b2 (n=11) |      |       |      |      |      |      |      |        |      |         |      |         |      |      |      |
|----------------------|-----------------|------|-------|------|------|------|------|------|--------|------|---------|------|---------|------|------|------|
|                      | G614            |      | Delta |      | BA.1 |      | BA.5 |      | BQ.1.1 |      | XBB.1.5 |      | BA.2.86 |      | JN.1 |      |
|                      | n               | %    | n     | %    | n    | %    | n    | %    | n      | %    | n       | %    | n       | %    | n    | %    |
| <100, n (%)          | 1               | 9.1  | 1     | 9.1  | 1    | 9.1  | 2    | 18.2 | 6      | 54.5 | 8       | 72.7 | 6       | 54.5 | 8    | 72.7 |
| >100 to <300, n (%)  | 1               | 9.1  | 1     | 9.1  | 4    | 36.4 | 2    | 18.2 | 4      | 36.4 | 3       | 27.3 | 2       | 18.2 | 3    | 27.3 |
| >300 to <1000, n (%) | 3               | 27.3 | 4     | 36.4 | 3    | 27.3 | 5    | 45.5 | 1      | 9.1  | 0       | 0.0  | 3       | 27.3 | 0    | 0.0  |
| ≥1000, n (%)         | 6               | 54.5 | 5     | 45.5 | 3    | 27.3 | 2    | 18.2 | 0      | 0.0  | 0       | 0.0  | 0       | 0.0  | 0    | 0.0  |

**Table S14. Neutralizing response by NT<sub>50</sub> categories against different SARS-CoV-2 variants in N- subjects of mRNA-1273 arm at day 180, related to Figure 4.**

|                      | mRNA-1273 (n=10) |      |       |      |      |      |      |      |        |      |         |      |         |      |      |      |
|----------------------|------------------|------|-------|------|------|------|------|------|--------|------|---------|------|---------|------|------|------|
|                      | G614             |      | Delta |      | BA.1 |      | BA.5 |      | BQ.1.1 |      | XBB.1.5 |      | BA.2.86 |      | JN.1 |      |
|                      | n                | %    | n     | %    | n    | %    | n    | %    | n      | %    | n       | %    | n       | %    | n    | %    |
| <100, n (%)          | 0                | 0.0  | 0     | 0.0  | 1    | 10.0 | 1    | 10.0 | 2      | 20.0 | 5       | 50.0 | 2       | 20.0 | 4    | 40.0 |
| >100 to <300, n (%)  | 1                | 10.0 | 1     | 10.0 | 1    | 10.0 | 1    | 10.0 | 4      | 40.0 | 5       | 50.0 | 5       | 50.0 | 3    | 30.0 |
| >300 to <1000, n (%) | 2                | 20.0 | 3     | 30.0 | 4    | 40.0 | 3    | 30.0 | 4      | 40.0 | 0       | 0.0  | 3       | 30.0 | 3    | 30.0 |
| ≥1000, n (%)         | 7                | 70.0 | 6     | 60.0 | 4    | 40.0 | 5    | 50.0 | 0      | 0.0  | 0       | 0.0  | 0       | 0.0  | 0    | 0.0  |

**Table S15. Neutralizing response by NT<sub>50</sub> categories against different SARS-CoV-2 variants in N+ subjects of BNT162b2 arm at day 180, related to Figure 4.**

|                      | BNT162b2 (n=18) |      |       |      |      |      |      |      |        |      |         |      |         |      |      |      |
|----------------------|-----------------|------|-------|------|------|------|------|------|--------|------|---------|------|---------|------|------|------|
|                      | G614            |      | Delta |      | BA.1 |      | BA.5 |      | BQ.1.1 |      | XBB.1.5 |      | BA.2.86 |      | JN.1 |      |
|                      | n               | %    | n     | %    | n    | %    | n    | %    | n      | %    | n       | %    | n       | %    | n    | %    |
| <100, n (%)          | 0               | 0.0  | 0     | 0.0  | 0    | 0.0  | 1    | 5.6  | 2      | 11.1 | 5       | 27.8 | 2       | 11.1 | 8    | 44.4 |
| >100 to <300, n (%)  | 0               | 0.0  | 0     | 0.0  | 2    | 11.1 | 0    | 0.0  | 8      | 44.4 | 8       | 44.4 | 9       | 50.0 | 6    | 33.3 |
| >300 to <1000, n (%) | 3               | 16.7 | 2     | 11.1 | 3    | 16.7 | 3    | 16.7 | 6      | 33.3 | 5       | 27.8 | 5       | 27.8 | 4    | 22.2 |
| ≥1000, n (%)         | 15              | 83.3 | 16    | 88.9 | 13   | 72.2 | 14   | 77.8 | 2      | 11.1 | 0       | 0.0  | 2       | 11.1 | 0    | 0.0  |

**Table S16. Neutralizing response by NT<sub>50</sub> categories against different SARS-CoV-2 variants in N+ subjects of mRNA-1273 arm at day 180, related to Figure 4.**

|                      | mRNA-1273 (n=11) |      |       |      |      |      |      |      |        |      |         |      |         |      |      |      |
|----------------------|------------------|------|-------|------|------|------|------|------|--------|------|---------|------|---------|------|------|------|
|                      | G614             |      | Delta |      | BA.1 |      | BA.5 |      | BQ.1.1 |      | XBB.1.5 |      | BA.2.86 |      | JN.1 |      |
|                      | n                | %    | n     | %    | n    | %    | n    | %    | n      | %    | n       | %    | n       | %    | n    | %    |
| <100, n (%)          | 0                | 0.0  | 0     | 0.0  | 0    | 0.0  | 0    | 0.0  | 3      | 27.3 | 5       | 45.5 | 2       | 18.2 | 3    | 27.3 |
| >100 to <300, n (%)  | 0                | 0.0  | 0     | 0.0  | 0    | 0.0  | 2    | 18.2 | 4      | 36.4 | 4       | 36.4 | 4       | 36.4 | 7    | 63.6 |
| >300 to <1000, n (%) | 4                | 36.4 | 3     | 27.3 | 4    | 36.4 | 2    | 18.2 | 1      | 9.1  | 1       | 9.1  | 4       | 36.4 | 0    | 0.0  |
| ≥1000, n (%)         | 7                | 63.6 | 8     | 72.7 | 7    | 63.6 | 7    | 63.6 | 3      | 27.3 | 1       | 9.1  | 1       | 9.1  | 1    | 9.1  |
